# Supplementary material for: Longitudinal Analysis of Serum Autoantibody-Reactivities in Patients with Primary Open Angle Glaucoma and Optic Disc Hemorrhage
Source: PLoS One. 2016 Dec 28;11(12):e0166813. doi: 10.1371/journal.pone.0166813 (PMC5193360; doi:10.1371/journal.pone.0166813)
Supplement: S2 Table — (XLSX) [file pone.0166813.s002.xlsx]

## Sheet: Tabelle1
Number	Name of spotted antigen
1	Cyclophilin A
2	HSP 10
3	Superoxide Dismutase
4	Myelin basic protein
5	HSP 27
6	HSP 70
7	Fibronectin
8	alpha-1-Antitrypsin
9	Annexin V
10	Ubiquitin
11	PKC Inhibitor
12	Prealbumin
13	gamma-synuclein
14	Glial fibrillary acidic protein
15	Calreticulin
16	Jo-1
17	HSP 60
18	beta-L-Chrystallin
19	Glutathione-S-Transferase
20	Actin
21	Glutamine Synthetase
22	Aconitase 2
23	Dihydropyrimidinase-related protein 2
24	Ubiquitin carboxyl-terminal hydrolase isozyme L1
25	Phosphatidylethanolamine-binding protein 1
26	Carbonic anhydrase 2
27	Creatine kinase B-type
28	Guanine nucleotide-binding protein G(I)/G(S)/G(T) subunit beta-1
29	Alpha-enolase
30	Glyceraldehyde-3-phosphate dehydrogenase
31	Eukaryotic initiation factor 4A-I
32	Protein kinase C substrate 80K-H
33	Poly(RC) binding protein 2
34	CDC-like kinase 3
35	THAP domain-containing protein 10
36	AP-1 complex subunit mu-1
37	Phospholipid phosphatase-related protein type 3
38	Cathepsin K
39	Tubulin beta-3 chain
40	Signal recognition particle 14 kDa protein
41	JmjC domain-containing protein 8
42	S-formylglutathione hydrolase
43	3-mercaptopyruvate sulfurtransferase
44	Mitogen-activated protein kinase 3
45	Glycerol-3-phosphate dehydrogenase, mitochondrial
46	Phospholipid hydroperoxide glutathione peroxidase, mitochondrial
47	Sec1 family domain containing 1
48	Selenoprotein O
49	SPRY domain-containing SOCS box protein 3
50	Alpha-adducin
51	Malat-Dehydrogenase
52	alpha-Synuclein
53	Microtubule-associated protein tau
54	Amyloid beta A4 protein
55	Dual specificity protein phosphatase 2
56	Tubulin-tyrosine ligase-like protein 12
57	Neuron specific enolase
